# Supplementary material for: Susceptibility of Anopheles gambiae from Côte d’Ivoire to insecticides used on insecticide-treated nets: evaluating the additional entomological impact of piperonyl butoxide and chlorfenapyr
Source: Research Square preprint supplement (doi:10.21203/rs.3.rs-21138/v4), 2020-12-06
Supplement: Supplementary file 1 [file ea6c468e6166c171d68af76e.xlsx]

## Sheet: Sheet1
		Abengourou	Aboisso	Adzope	Beoumi	Bettie	Bouake	Bouna	Daloa	Dabakala	Gagnoa	Nassian	Odienne	Sakassou	San Pedro	Yamoussoukro
Permethrin	dead	1	0	2	0	1	2	7	1	4	6	5	2	5	4	1
	alive	93	84	94	83	97	93	89	90	96	89	96	96	94	90	92
Permethrin+PBO	dead	4	9	14	5	8	18	54	11	11	44	44	20	46	24	50
	alive	85	75	81	72	92	75	47	82	89	50	48	80	38	67	47
Deltamethrin	dead	0	5	0	5	10	0	8	1	5	4	2	7	5	4	6
	alive	90	79	91	71	87	100	78	94	92	83	79	89	96	87	177
Deltamethrin+PBO	dead	13	47	45	59	42	55	68	9	43	47	26	68	27	19	68
	alive	76	37	46	14	52	40	27	76	51	52	39	28	63	70	25
Alphacypermethrin	dead	0	0	4	4	2	5	2	4	4	8	10	1	0	3	0
	alive	90	81	87	84	103	101	91	89	94	87	76	90	93	97	100
Alphacypermethrin+PBO	dead	3	70	26	44	77	46	21	9	9	18	20	50	27	17	23
	alive	74	14	71	39	28	57	75	84	86	73	43	51	61	82	69
